# Supplementary material for: Evaluation of gilteritinib in combination with chemotherapy in preclinical models of FLT3-ITD+ acute myeloid leukemia
Source: PubMed Central journal article supplement (PMC6493465; doi:10.18632/oncotarget.26811), 2019-04-02
Supplement: oncotarget-10-2530-s001.pdf [file oncotarget-10-2530-s001.pdf]

## Evaluation of gilteritinib in combination with chemotherapy in preclinical models of *FLT3-ITD*<sup>+</sup> acute myeloid leukemia

### SUPPLEMENTARY MATERIALS

#### Tumor evaluation

Body weight and tumor diameter were measured in xenografted nude mice xenografted with MV4-11 cells on the indicated days for each experimental group: 1. Gilteritinib plus AraC/DNR: Days -1, 3, 6, 9, 14, 17, and 21; 2. Gilteritinib plus AraC/IDR: Days 0, 3, 7, 10, 14, 17, and 21; 3. Gilteritinib plus Aza: Days -1, 2, 5, 8, 12, 15, 19, and 21. Body weight and tumor assessments obtained on Day -1 were designated as Day 0 (baseline) measurements. Tumor diameter was measured using a caliper and tumor volume was determined by calculating the volume of an ellipsoid (ie,  $Length \times Width^2 \times 0.5$ ). The percent inhibition of tumor growth was calculated using the formula:

$$100 \times (1 - [mean \{(tumor \ volume \ of \ each \ mouse \ on \ the \ last \ day \ of \ observation) - (tumor \ volume \ of \ each \ mouse \ on \ Day \ 0)\} \ of \ each \ group] / [mean \{(tumor \ volume \ of \ each \ mouse \ on \ the \ last \ day \ of \ observation) - (tumor \ volume \ of \ each \ mouse \ on \ Day \ 0)\} \ of \ the \ control \ group])$$

The percent tumor regression was calculated using the formula:

$$100 \times (1 - [mean \ tumor \ volume \ of \ each \ group \ on \ the \ last \ day \ of \ observation] / [mean \ tumor \ volume \ of \ each \ group \ on \ Day \ 0])$$

#### Treatments for pharmacokinetic assays

For pharmacokinetic (PK) assays involving gilteritinib plus AraC and IDR, nude mice xenografted with MV4-11 cells received one of the following combination treatments: 1. Oral gilteritinib (3 mg/kg in 0.5% methylcellulose); 2. Oral methylcellulose (0.5%) in combination with IV IDR (0.5 mg/kg) and IP AraC (50 mg/kg); 3. Oral gilteritinib (3 mg/kg) plus IV IDR (0.5 mg/kg) and IP AraC (50 mg/kg). For combination PK assays involving gilteritinib plus Aza, nude mice xenografted with MV4-11 received one of the following:

1. Oral gilteritinib (3 mg/kg) plus IV saline;
2. Oral methylcellulose (0.5%) plus IV Aza (3 mg/kg);
3. Oral gilteritinib (3 mg/kg) plus IV Aza (3 mg/kg).
